# Supplementary material for: Plethysmographic Measurements as Novel Predictors of Mortality in Pulmonary Embolism
Source: Research Square preprint supplement (doi:10.21203/rs.3.rs-7432049/v1), 2025-09-22
Supplement: Supplementary file 1 [file 86d5442f308f33d88870321d.docx]

# HIGHLIGHTS

- PVI is a strong and independent predictor of mortality in patients with PE
- This study is the first to evaluate the PVI in PE.
- PVI is suitable for ED use due to their easy accessibility,rapid results,noninvasive.
- The PVI had the highest PPV for mortality among all parameters analyzed (83% spec.)
